# Supplementary material for: Response of distinct soil types to cyanobacterial biofertilizer inoculation
Source: Research Square preprint supplement (doi:10.21203/rs.3.rs-3368169/v1), 2023-09-26
Supplement: Supplementary file 1 [file 6e3ce50b9d5b2e61b768bf86.docx]

**Supplementary Information**

**Response of distinct soil types to cyanobacterial biofertilizer inoculation**

**Babanpreet Kour 1, Preeti Sharma 1,2, Ramya S 1, Sandeep Gawdiya 3, Sudheer K 1, Balasubramanian Ramakrishnan 1, ***

1Division of Microbiology, ICAR-Indian Agricultural Research Institute, New Delhi, India.

2 University Institute of Engineering & Technology, Kurukshetra University, Kurukshetra, Haryana, India.

3 Division of Agronomy, ICAR-Indian Agricultural Research Institute, New Delhi, India.

****Address for correspondence***:

**Dr. B. Ramakrishnan**

Division of Microbiology

ICAR-Indian Agricultural Research Institute

New Delhi, India

Mobile: +91 7838222671

E-mail: [ramakrishnanbala@yahoo.com/b.ramakrishnan@icar.gov.in](mailto:ramakrishnanbala@yahoo.com/b.ramakrishnan@icar.gov.in)

**Supplementary Table S1**. Primers and thermal cycling conditions for PCR reactions

| Target gene | Primer | Primer sequence (5’ to 3’) | Reaction conditions  (oC) | Amplified fragment  (bp) | References |
| --- | --- | --- | --- | --- | --- |
| Total bacteria | Eub338  Eub518 | ACTCCTACGGGAGGCAGCAG  ATTACCGCGGCTGCTGG | 10 min of 95oC, 35 cycles consisting of 10s at 95oC, 15s at 53oC, and 40s at 72oC | 200 | Feirer et al. (2005) |
| Total archaea | ARCH-mix1369F  Prok-1541R | 1:1 mixture of Arch1-1369F & Arch2-1369F  Arch1-1369F:CGGTGAATACGTCCCTGC,  and Arch2-1369F: CGGTGAATATGCCCCTGC;  AAGGAGGTGATCC RGCCGCA | 10 min of 95oC, 40 cycles consisting of 10s at 95oC, 15s at 55oC, and 25s at 72oC | 172 | Suzuki et al. (2000) |
| Cyanobacteria | Cya 359F  Cya 781Ra  & Cya 781Rb | GGG GAA TYT TCC GCA ATG GG  GAC TAC TGG GGT ATC TAA TCC CAT T  GAC TAC AGG GGT ATC TAA TCC CTT T | 10 min of 95oC, 40 cycles consisting of 10s at 95oC, 10s at 60oC, and 25s at 72oC | 450 | Nubel et al. (1997) |
| Cyanophage | CPS1  CPS8 | GTA GWA TTT TCT ACA TTG AYG TTG  G AAA TAY TTD CCA ACA WAT GGA | 10 min of 95oC, 35 cycles consisting of 60s at 94oC, 60s at 55oC, and 60s at 72oC | 600 | Wang et al. (2011) |
| *nifH* | *nifH-*F  *nifH*-R | TGCGAYCCSAARGCBGACTC  ATSGCCATCATYTCRCCGGA | 10 min of 95oC, 40 cycles consisting of 10s at 95oC, 15s at 55oC, and 40s at 72oC | 227 | Poly et al. (2001) |
| Bacterial *amoA* | *amoA*-1F  *amoA*-2R | GGGGTTTCTACTGGTGGT  CCCCTCKGSAAAGCCTTCTTC | 10 min of 95oC, 40 cycles consisting of 10s at 95oC, 15s at 53oC, and 40s at 72oC | 491 | Rotthauwe et al. (1997) |
| Archaeal *amoA* | CrenamoA-23fd CrenamoA-616rd | ATGGTCTGGCTWAGACG  GCCATCCATCTGTATGTCCA | 10 min of 95oC, 40 cycles consisting of 10s at 95oC, 15s at 58oC, and 40s at 72oC | 592 | Tourna et al*.* (2008) |
| *nirK* | *nir*K-1F  *nir*K-3R | GG(A/C)ATGGT(G/T)CC(C/G)TGGCA  GAACTTGCCGGT(A/C/G)G(C/T)CCAGAC | 10 min of 95oC, 40 cycles consisting of 10s at 95oC, 15s at 45oC, and 30s at 72oC | 392 | Brakeret al. (1998) |
| nirS | *nirS*-1F  *nirS*-6R | CCTA(C/T)TGGCCGCC(A/G)CA(A/G)T  GCCGCCGTC(A/G)TG(A/C/G)AGGAA | 10 min of 95oC, 40 cycles consisting of 10s at 95oC, 15s at 45oC, and 40s at 72oC | 256 | Brakeret al. (1998) |
| *narG* | *narG*-1960m2f  *narG*-2050m2R | TA(CT)GT(GC)GGGCAGGA(AG)AAACTG  CGTAGAAGAAGCTGGTGCTGTT | 10 min of 95oC, 40 cycles consisting of 10s at 95oC, 30s at 60oC, and 40s at 72oC | 110 | López-Gutiérrez et al. (2004) |
| *nosZ* | *nosZ-*1F  nosZ-1R | WCSYTGTTCMTCGACAGCCAG  ATGTCGATCARCTGVKCRTTYTC | 10 min of 95oC, 40 cycles consisting of 10s at 95oC, 15s at 60oC, and 30s at 72oC | 259 | Henry et al. (2006) |

**Legends for Supplementary figures**

**Supplementary Figure S1.**

Effect of cyanobacterial inoculation on the abundance of archaeal 16S rRNA gene copies in soils incubated under the light-dark or continuous dark cycles on (a) 15 DAI on the left axis (b) 30 DAI on the right axis. Vertical bars represent the mean copy number of genes after 15 DAI, while vertical boxes show abundances after 30 DAI (*n=3*). Error bars represent the standard error ± 0.05 for individual variables. (IARI-Indian Agricultural Research Institute; SUB-Subsurface; KUT-Kuttanad; RAJ-Rajasthan; ADU-Aduthurai; UMI-Umiam; & KAR-Karnal given on the *x-*axis).

**Supplementary Figure S2.**

Total bacterial 16S rRNA gene copies as influenced by cyanobacterial inoculation in distinct soil types, incubated under the light-dark or continuous dark cycles on (a) 15 DAI on the left axis (b) 30 DAI on the right axis. Vertical bars represent the mean copy number of genes after 15 DAI, while vertical boxes show abundances after 30 DAI (*n=3*). Error bars represent the standard error ± 0.05 for individual variables. (IARI-Indian Agricultural Research Institute; SUB-Subsurface; KUT-Kuttanad; RAJ-Rajasthan; ADU-Aduthurai; UMI-Umiam; & KAR-Karnal given on the *x-*axis).

**Supplementary Figure S3**. Abundance of (a) archaeal *amoA* and (b) bacterial *amoA* gene copies in soils without or with cyanobacterial inoculant, incubated under the light-dark or continuous dark cycles on 15 DAI and 30 DAI. Each bubble represents the mean copy number of genes (*n=3*) (IARI-Indian Agricultural Research Institute; SUB-Subsurface; KUT-Kuttanad; RAJ-Rajasthan; ADU-Aduthurai; UMI-Umiam; & KAR-Karnal given on the *y-*axis)

**Supplementary Figure S4**. Gene copies of (a) *nirS*, (b) *nirK*, (c) *narG*, and (d) *nosZ* in soils without or with cyanobacterial inoculant, incubated under light-dark (left) or continuous dark (right) cycles on 15 DAI and 30 DAI. The height of nodes indicates the absolute abundances of individual genes (*n=3*), and the links represent the gene copies in source soils. Different colors present different soil types. Different alphabets (Tukey’s HSD) are significantly different (p<0.05) between the treatments. (IARI-Indian Agricultural Research Institute; SUB-Subsurface; KUT-Kuttanad; RAJ-Rajasthan; ADU-Aduthurai; UMI-Umiam; & KAR-Karnal).

Supplementary Figure S1


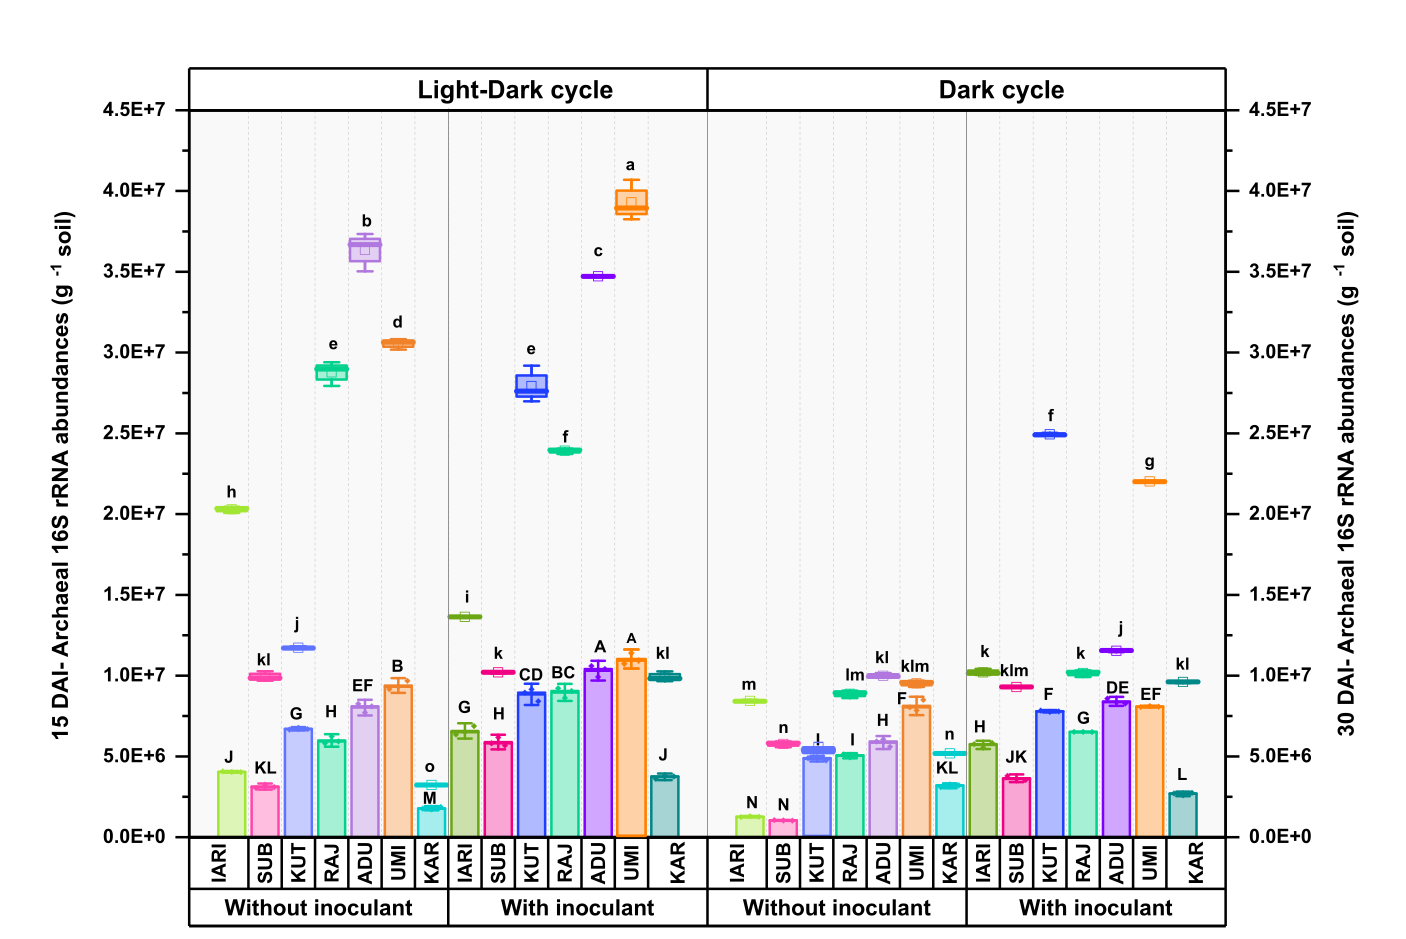


Supplementary Figure S2


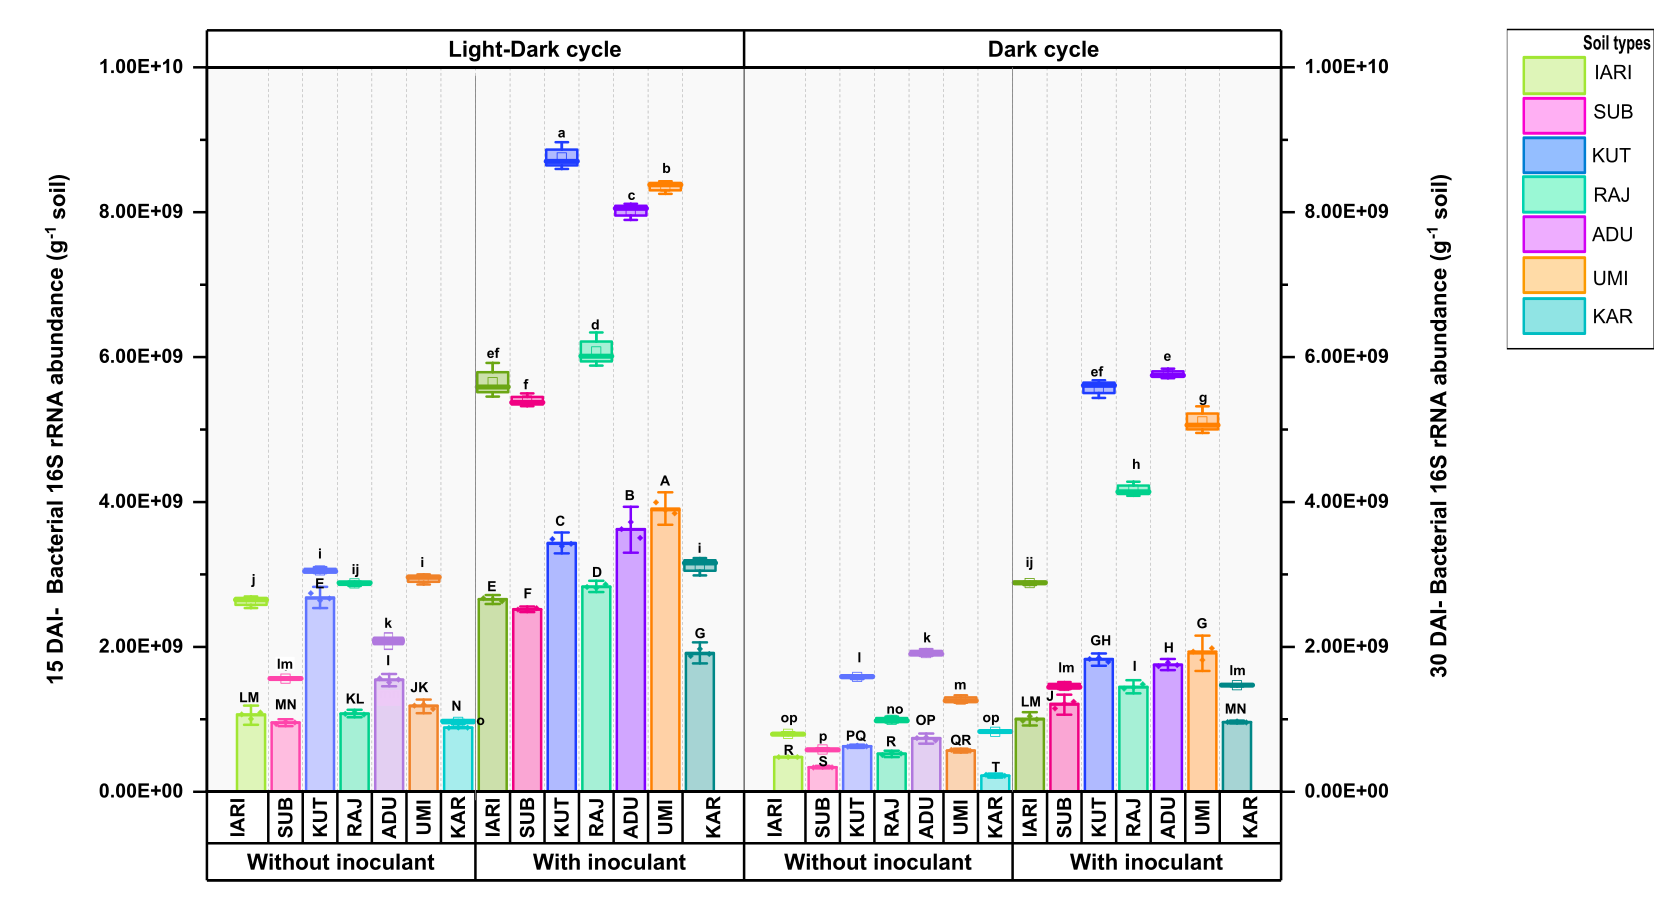


Supplementary Figure S3 (a)


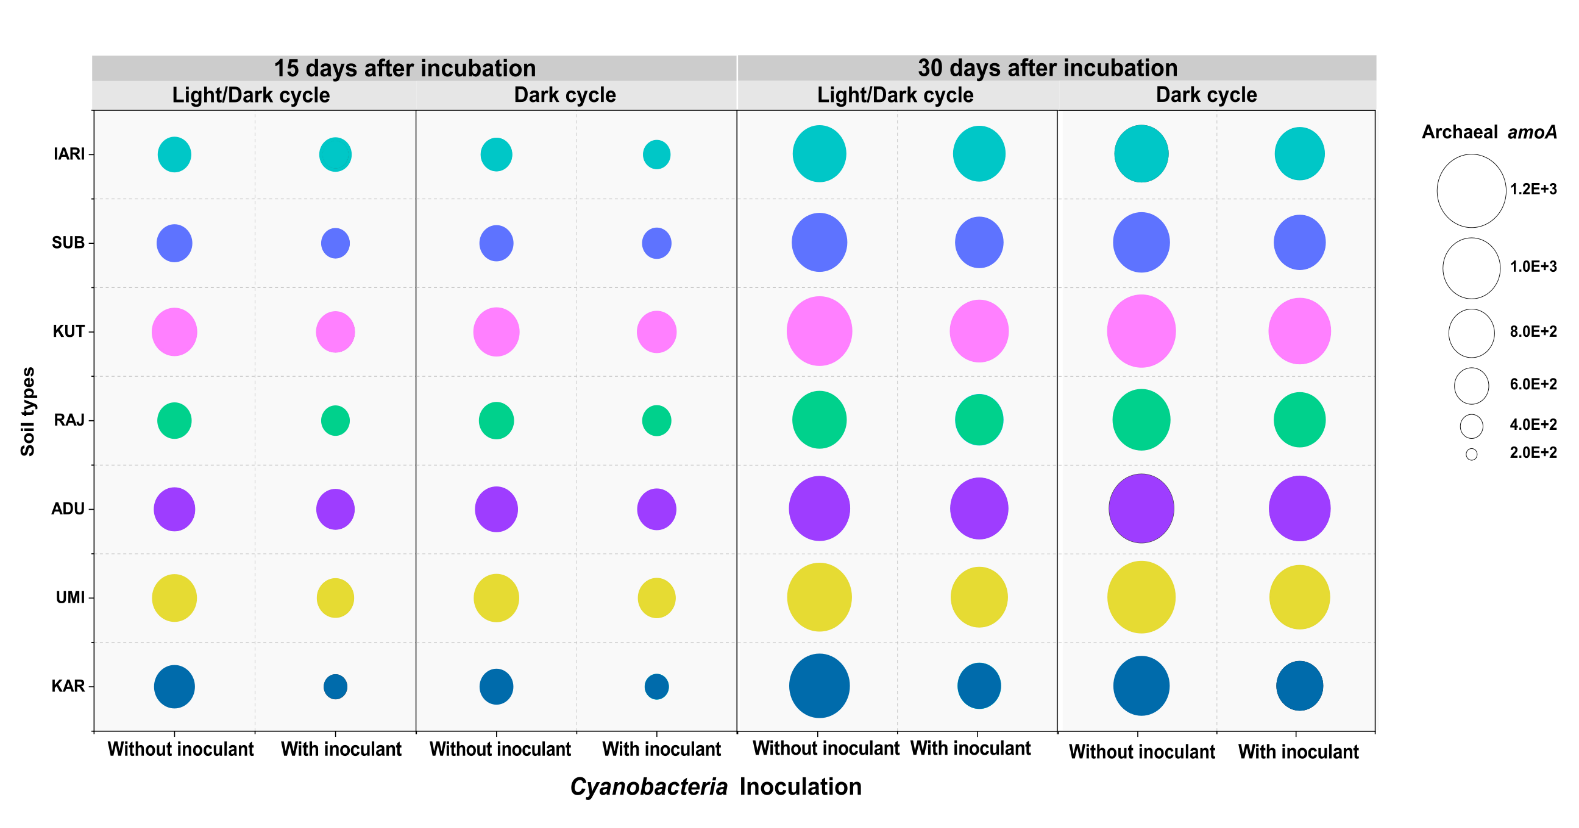


Supplementary Figure S3 (b)


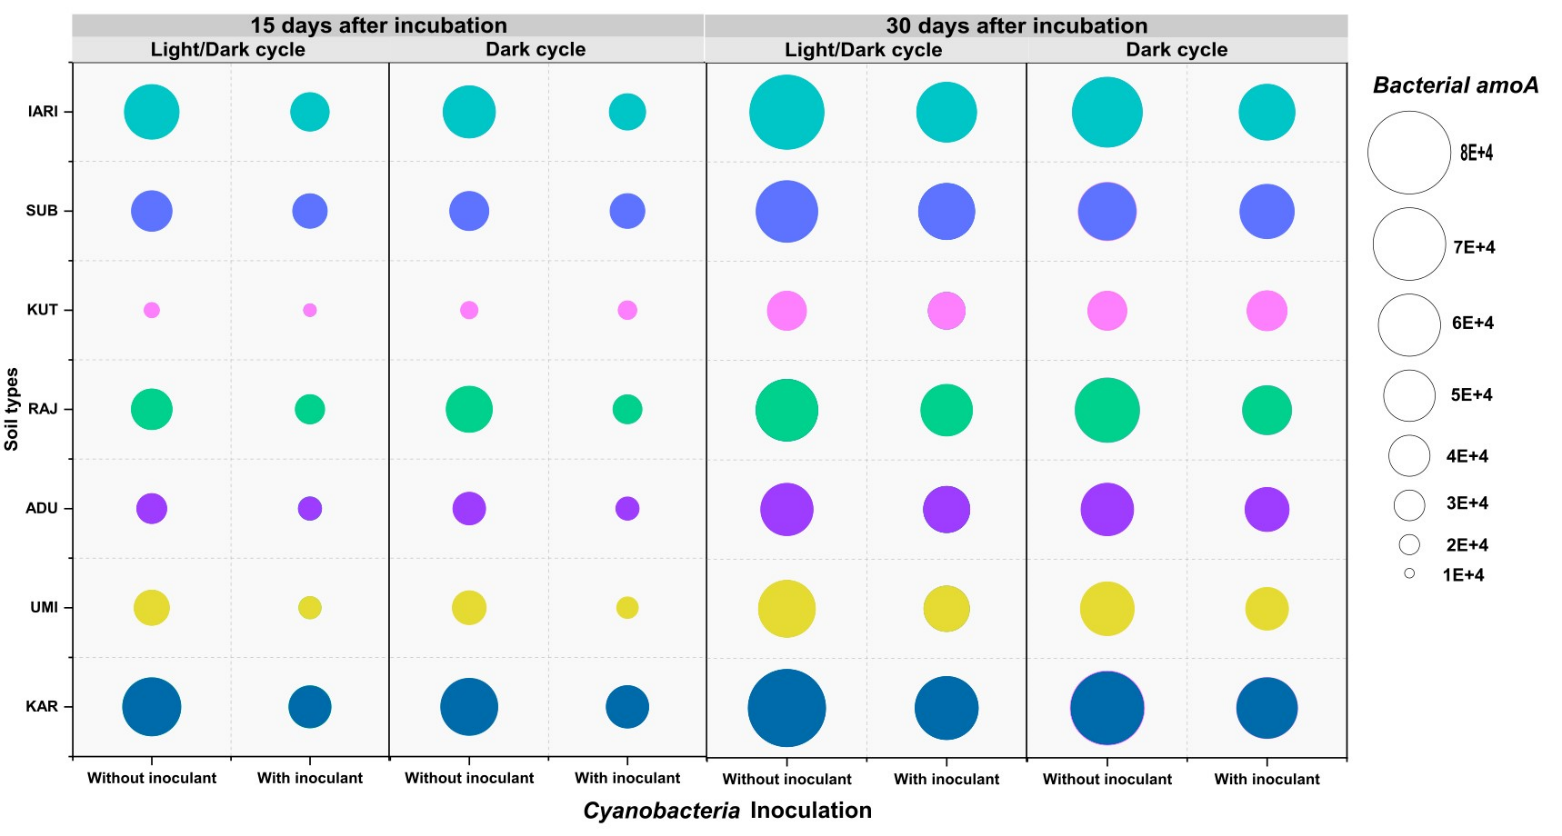


SupplementaryFigureS4 (a)


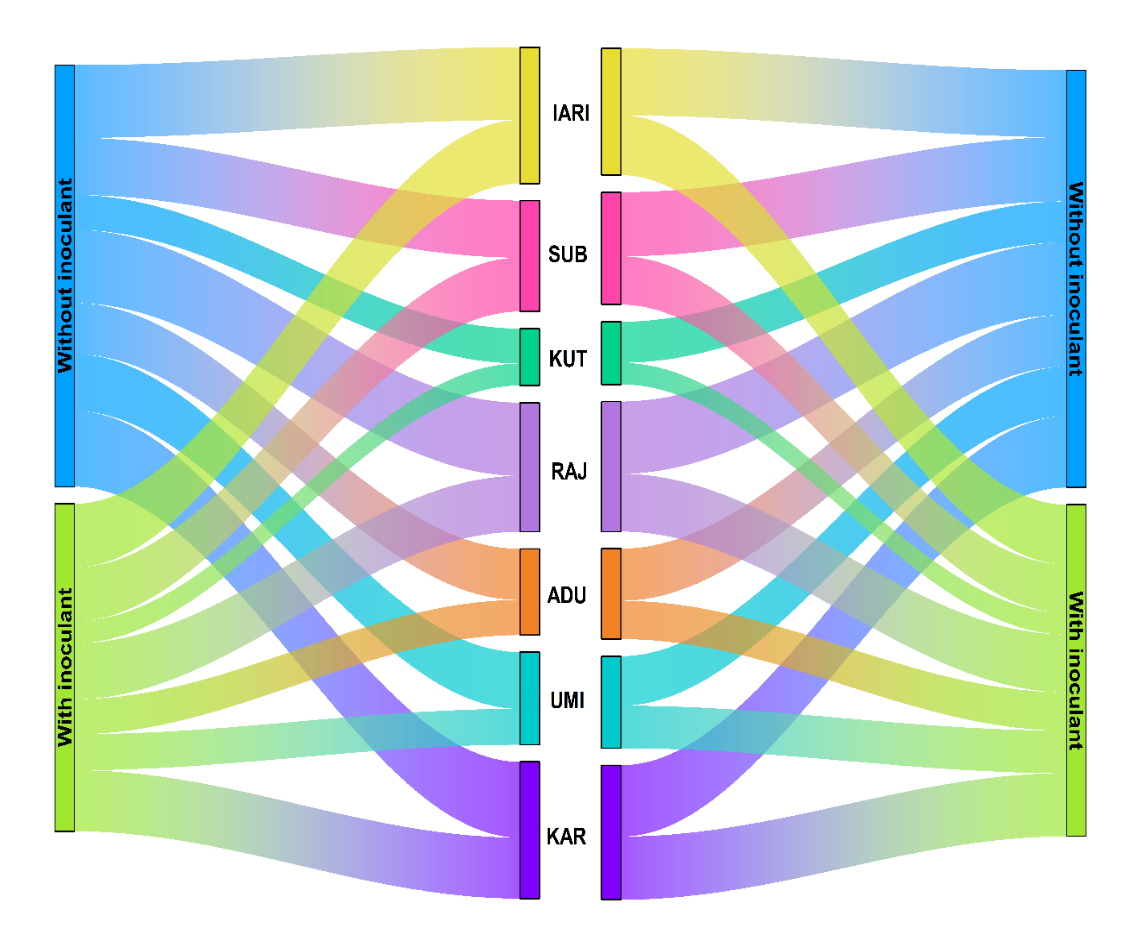


**Light-Dark cycle**

**Dark cycle**

**Relative abundance of *nirS* (g-1 soil) after 15 days of incubation**


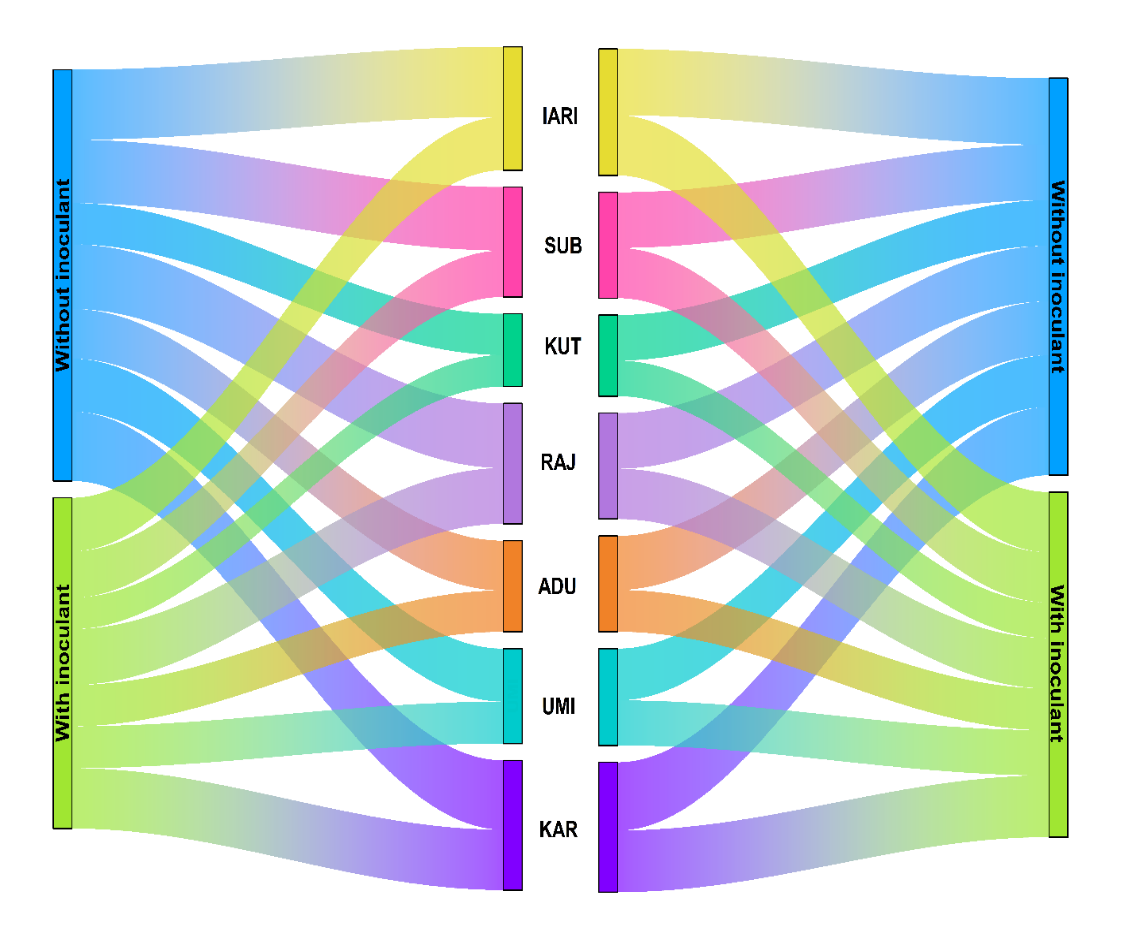


**Relative abundance of *nirS* (g-1 soil) after 30 days of incubation**

**Light-Dark cycle**

**Dark cycle**

**B**

**BC**

**A**

**A**

**BC**

**C**

**CD**

**CD**

**DE**

**E**

**F**

**FG**

**FG**

**GH**

**HI**

**HI**

**HI**

**HI**

**IJ**

**JK**

**K**

**KL**

**L**

**M**

**M**

**M**

**N**

**N**

**CD**

**EF**

**MN**

**B**

**IJ**

**C**

**FGH**

**A**

**BC**

**O**

**KL**

**FG**

**A**

**MN**

**B**

**FG**

**LM**

**JK**

**O**

**FG**

**JK**

**DE**

**LM**

**GHI**

**HIJ**

**B**

**D**

**N**

SupplementaryFigure S4 (b)


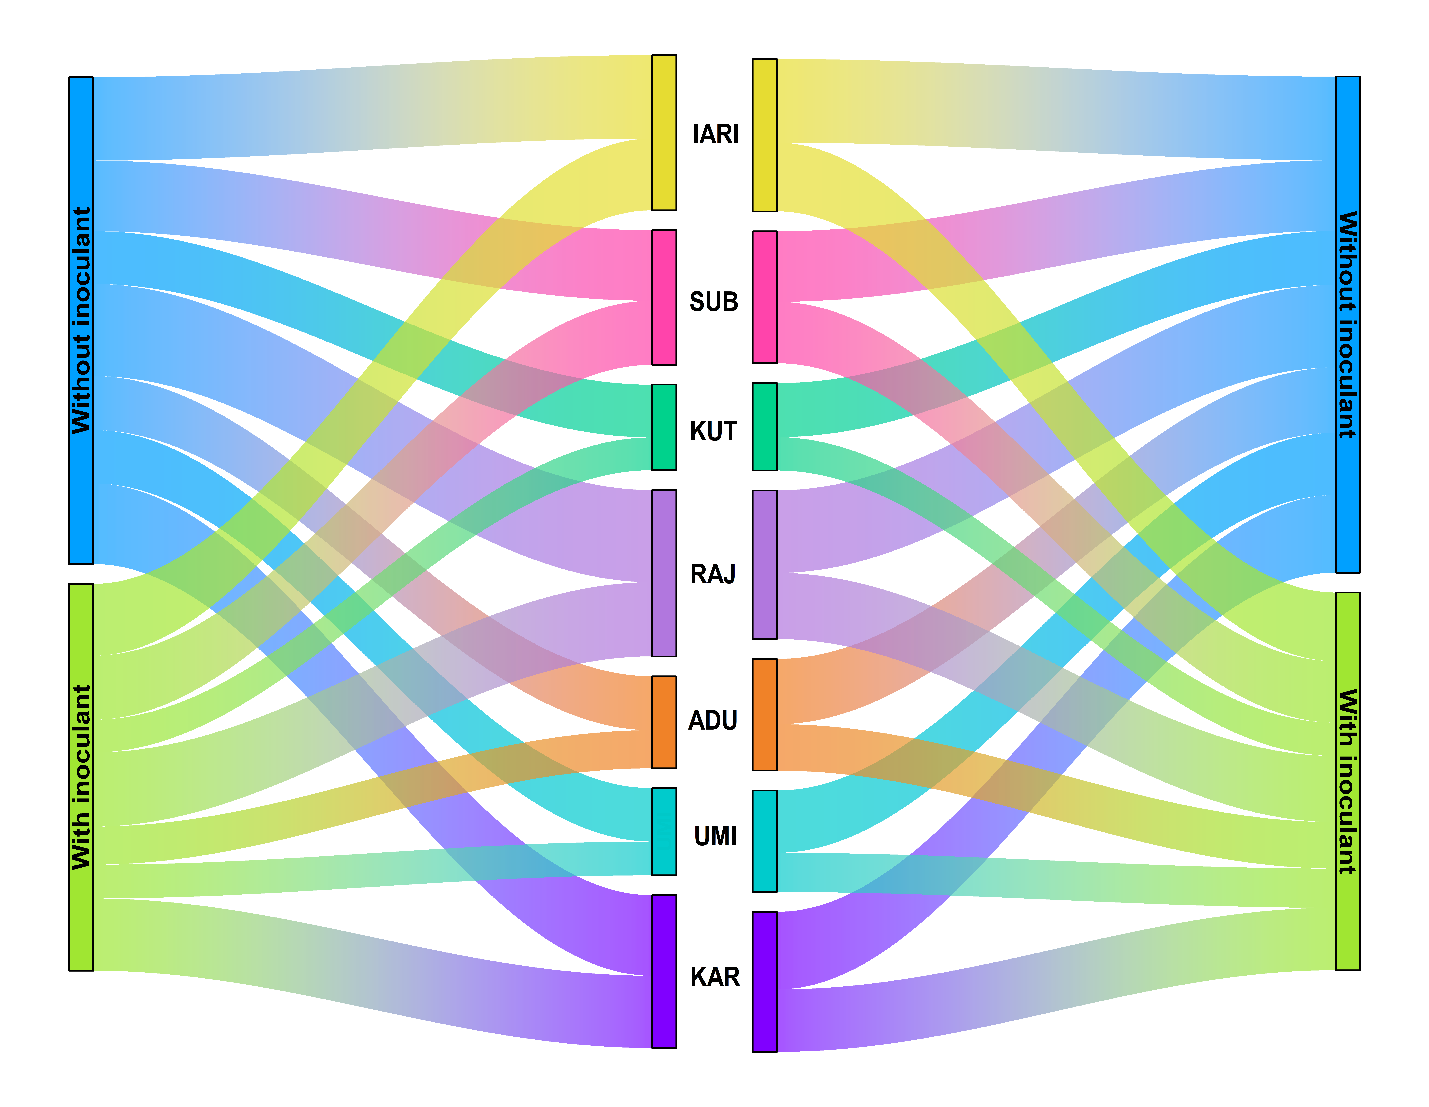


**Relative abundance of *nirK* (g-1 soil) after 15 days of incubation**

**Light-Dark cycle**

**Dark cycle**


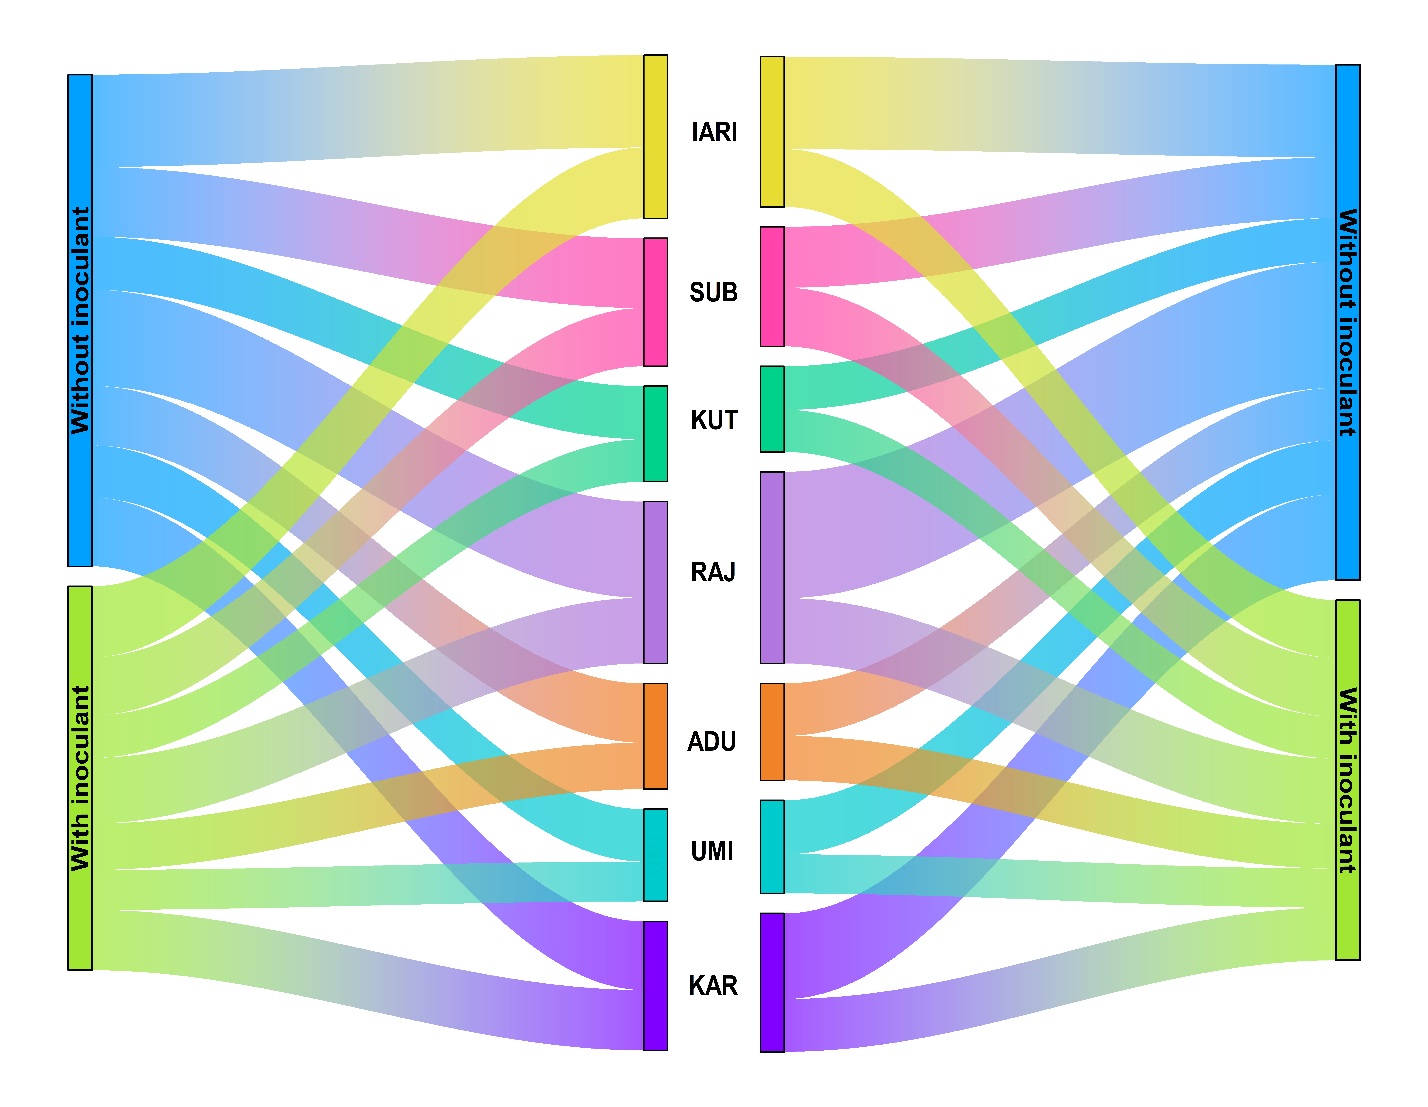


**Relative abundance of *nirK* (g-1 soil) after 30 days of incubation**

**Dark cycle**

**Light-Dark cycle**

**E**

**LM**

**I**

**KL**

**A**

**DE**

**M**

**M**

**H**

**I**

**H**

**EF**

BC

**I**

**M**

**H**

**K**

**J**

**GH**

**FGH**

**BC**

**LM**

**CD**

**I**

**EFG**

**EFG**

**B**

**H**

**GH**

**N**

**K**

**GHI**

**B**

**EF**

**MN**

**D**

**DE**

**L**

**HIJ**

**D**

**B**

**K**

**JK**

**IJK**

**N**

**LM**

**K**

**DE**

**A**

**LMN**

**C**

**LM**

**FG**

**M**

**GHI**

**GH**

SupplementaryFigure S4 (c)


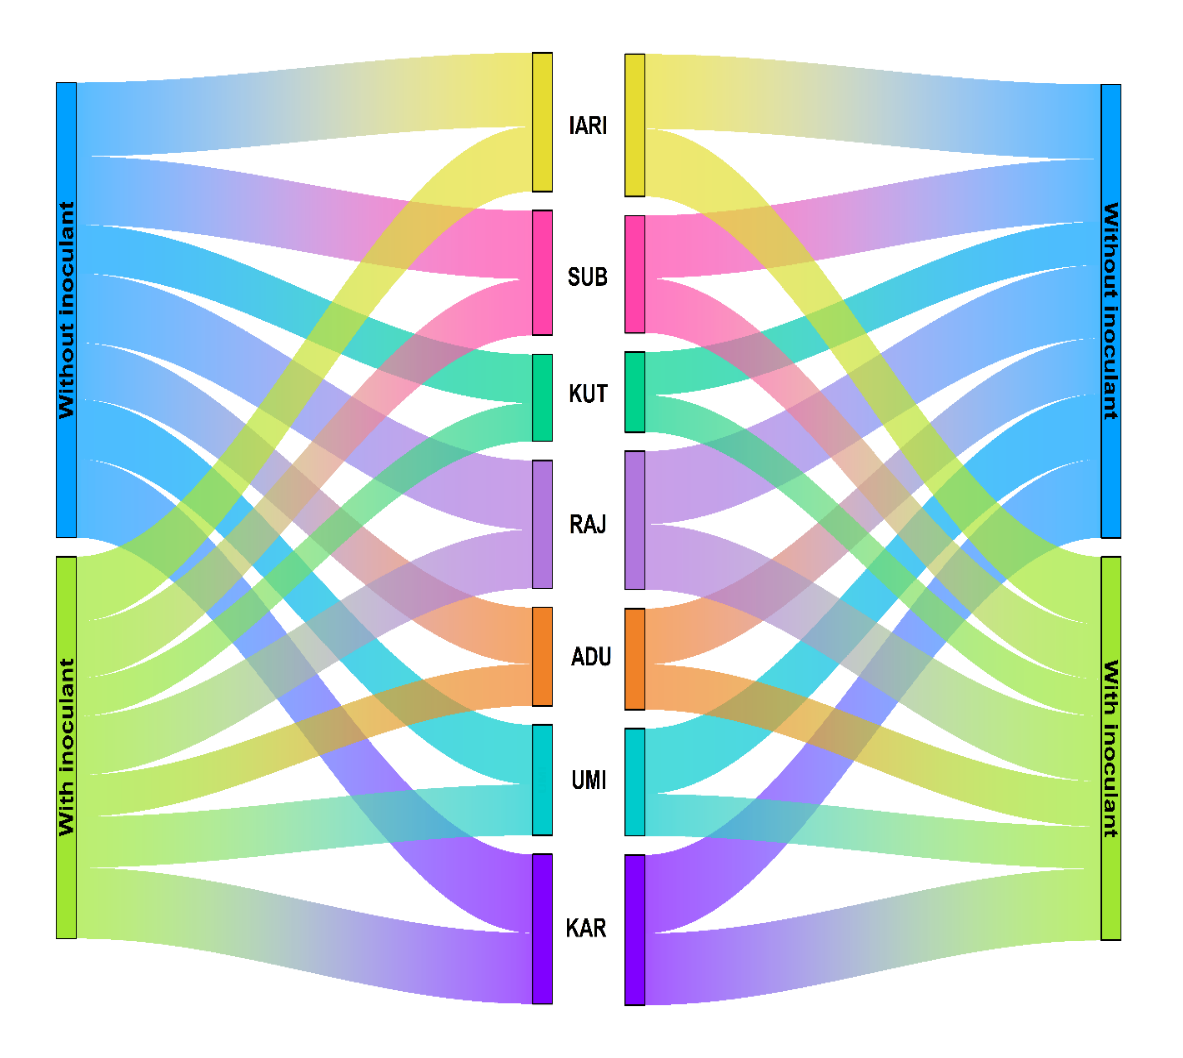


**Relative abundance of *narG* (g-1 soil) after 15 days of incubation**

**Light-Dark cycle**

**Dark cycle**


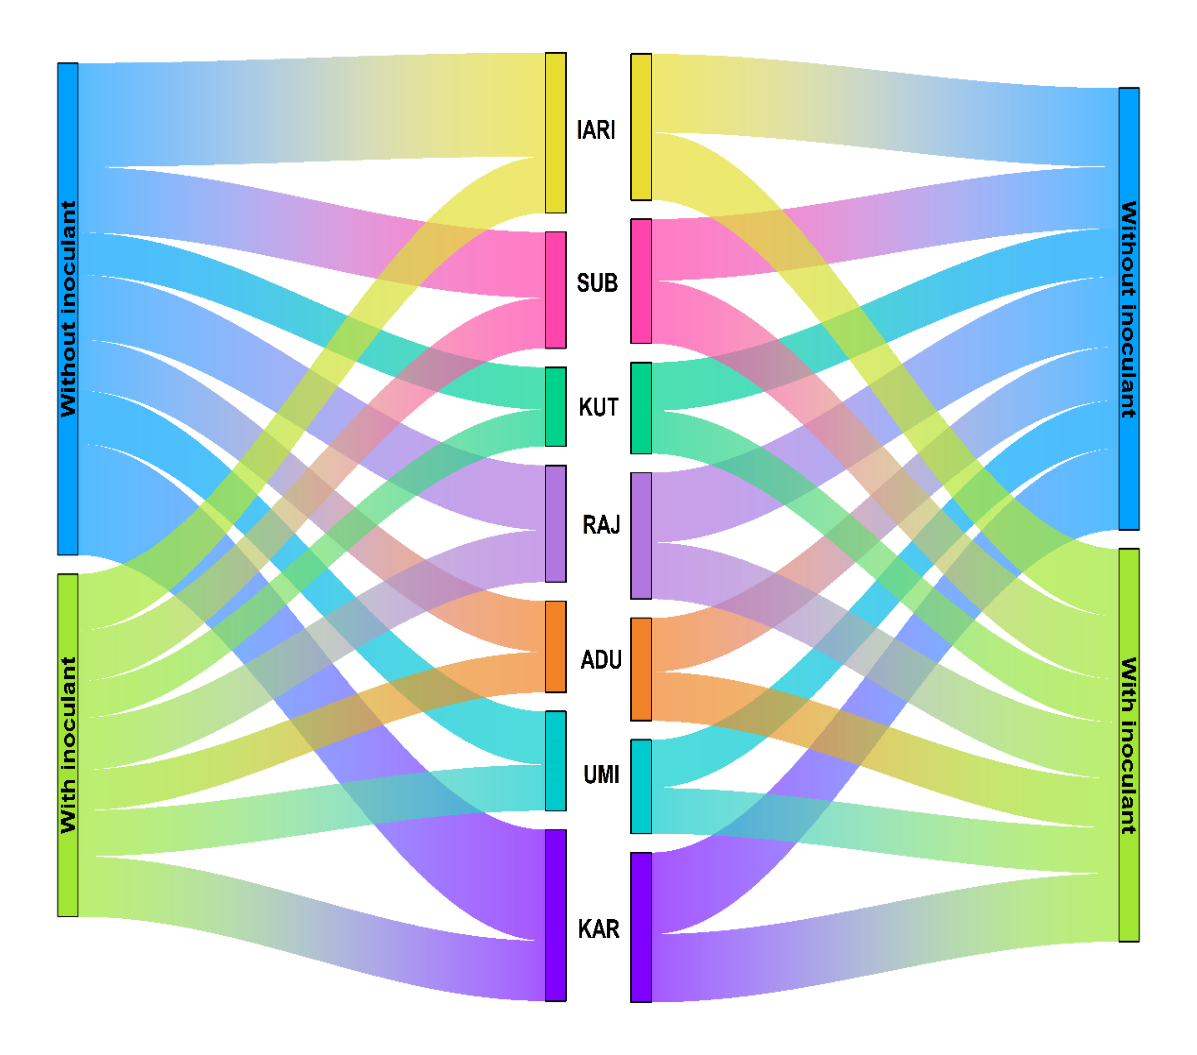


**Relative abundance of *narG* (g-1 soil) after 30 days of incubation**

**Light-Dark cycle**

**Dark cycle**

**EFG**

**KLM**

**HIJ**

**NOP**

**DE**

**IJ**

**P**

**D**

**A**

**J**

**JK**

**GHI**

**B**

**MNO**

**DE**

**MNO**

**MNO**

**LM**

**JKL**

**IJ**

**DE**

**OP**

**C**

**MN**

**GH**

**DEF**

**C**

**FG**

**BC**

**I**

**GH**

**J**

**CD**

**GH**

**J**

**CDE**

**A**

**H**

**H**

**EF**

**B**

**I**

**EF**

**GH**

**J**

**J**

**I**

**GH**

**DE**

**K**

**BC**

**J**

**H**

**FG**

**CDE**

**I**

SupplementaryFigure S4 (d)


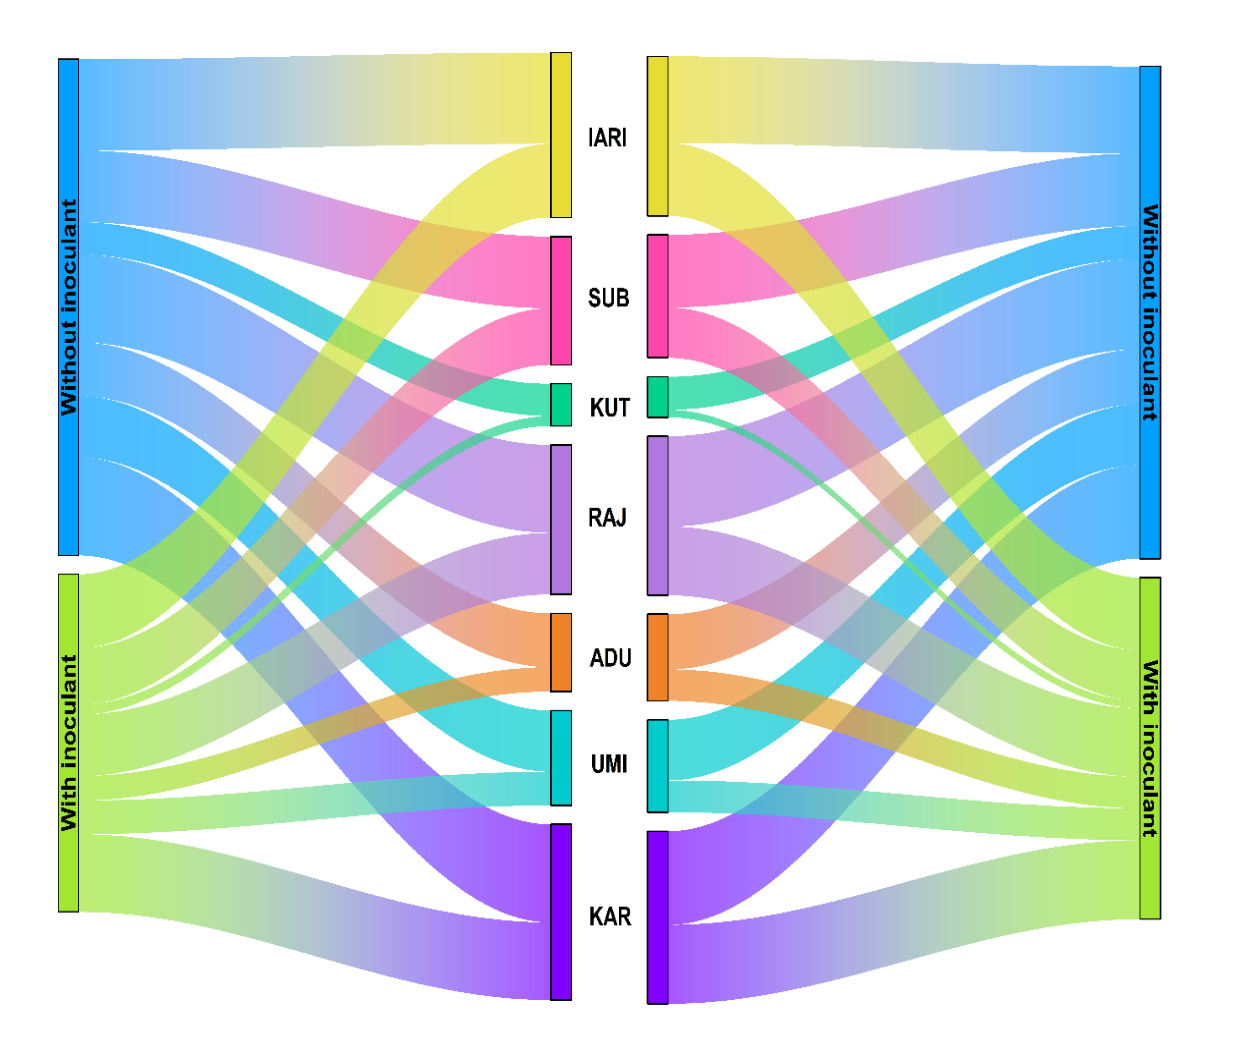


**Relative abundance of *nosZ* (g-1 soil) after 15 days of incubation**

**Dark cycle**

**Light-Dark cycle**


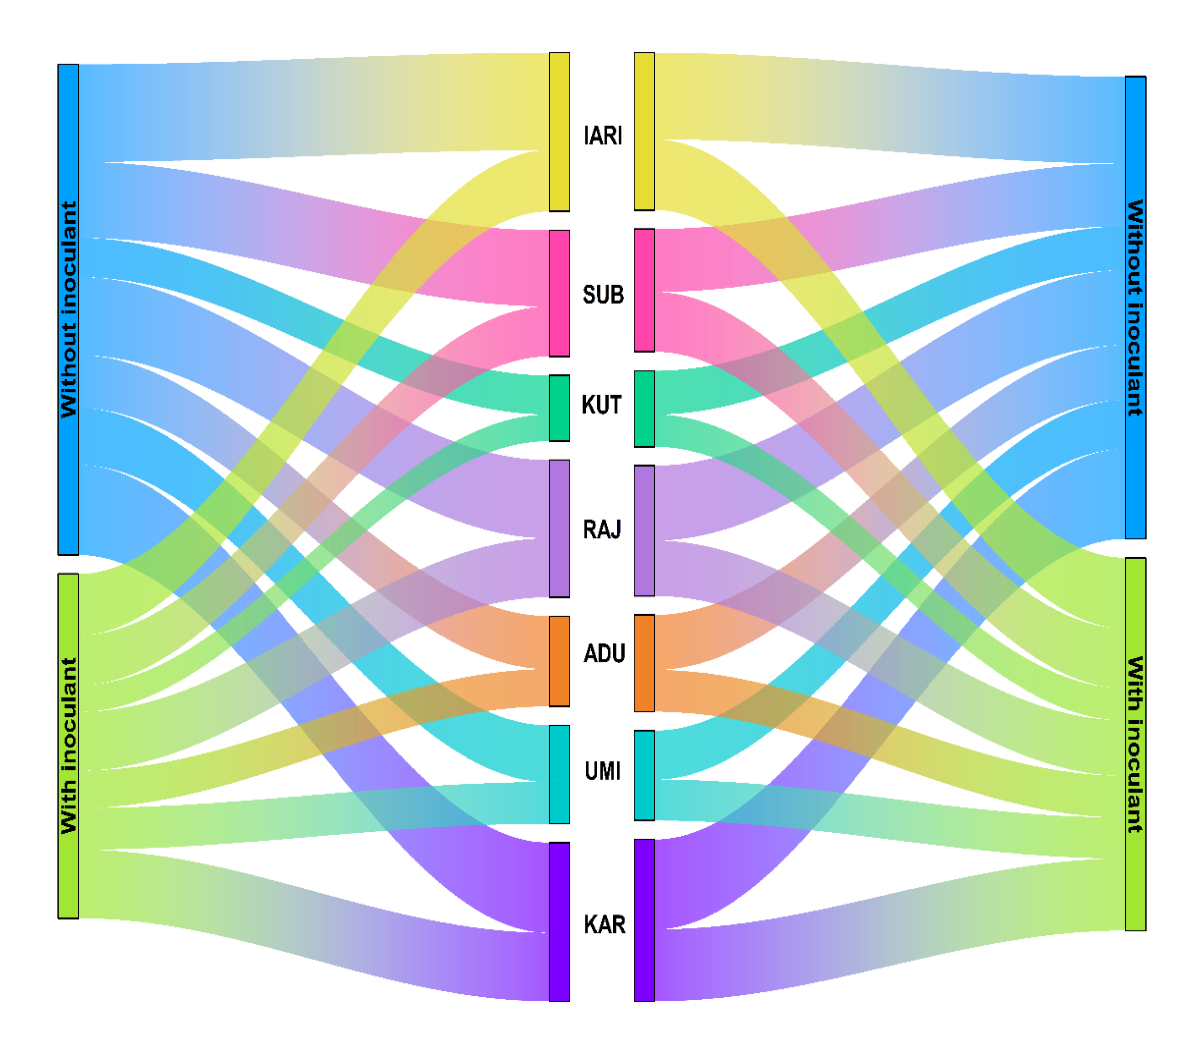


**Light-Dark cycle**

**Dark cycle**

**Relative abundance of *nosZ* (g-1 soil) after 30 days of incubation**

**D**

**J**

**HI**

**JK**

**C**

**FG**

**L**

**C**

**B**

**FGH**

**GH**

**E**

**A**

**J**

**DE**

**MNO**

**J**

**J**

**FGH**

**IJ**

**CD**

**KL**

**D**

**IJ**

**E**

**DEF**

**D**

**FG**

**DE**

**K**

**GH**

**L**

**C**

**GH**

**M**

**F**

**A**

**IJ**

**HIJ**

**EF**

**BC**

**K**

**D**

**G**

**K**

**LM**

**HI**

**F**

**DE**

**M**

**A**

**K**

**EF**

**EF**

**BC**

**J**

**References**

Braker G, Fesefeldt A, Witzel KP (1998) Development of PCR primer systems for amplification of nitrite reductase genes (*nirK* and *nirS*) to detect denitrifying bacteria in environmental samples. Appl Environ Microbiol 64:3769-3775

Feirer N, Jackson JA, Vilgalys R, Jackson RB (2005) Assessment of soil microbial community structure by use of taxon-specific quantitative PCR assays. Appl Environ Microbiol 71:4117-4120

Henry S, Bru D, Stres B, Hallet S, Philippot L (2006) Quantitative detection of the *nosZ* gene, encoding nitrous oxide reductase, and comparison of the abundances of 16S rRNA, *narG, nirK*, and *nosZ* genes in soils. Appl Environ Microbiol 72:5181-5189

López-Gutiérrez JC, Henry S, Hallet S, Martin-Laurent F, Catroux G, Philippot L (2004) Quantification of a novel group of nitrate-reducing bacteria in the environment by real-time PCR. J Microbiol Methods 57:399-407

Nübel U, Garcia-Pichel F, Muyzer G (1997) PCR primers to amplify 16S rRNA genes from cyanobacteria. Appl Environ Microbiol 63:3327-3332

Poly F, Monrozier LJ, Bally R (2001) Improvement in the RFLP procedure for studying the diversity of *nifH* genes in communities of nitrogen fixers in soil. Res Microbiol 152:95-103

Rotthauwe JH, Witzel KP, Liesack W (1997) The ammonia monooxygenase structural gene *amoA* as a functional marker: molecular fine-scale analysis of natural ammonia-oxidizing populations. Appl Environ Microbiol 63:4704-4712

Suzuki MT, Taylor LT, DeLong EF (2000) Quantitative analysis of small-subunit rRNA genes in mixed microbial populations via 5′-nuclease assays. Appl Environ Microbiol 66:4605-4614

Tourna M, Freitag TE, Nicol GW, Prosser JI (2008) Growth, activity and temperature responses of ammonia‐oxidizing archaea and bacteria in soil microcosms. Environ Microbiol 10:1357-1364

Wang G, Asakawa S, Kimura M (2011) Spatial and temporal changes of cyanophage communities in paddy field soils as revealed by the capsid assembly protein gene g20. FEMS Microbiol Ecol76:352-359
